# Supplementary material
Source: Research Square preprint supplement (doi:10.21203/rs.3.rs-9097791/v1)
Supplement: Supplementary file 1 [file 8402b45ba919337aca58c575.xlsx]

## Sheet: README
Sheet

## Sheet: Analysis
Network

## Sheet: Nodes
Network

## Sheet: Edges
Network
