# Supplementary material
Source: Research Square preprint supplement (doi:10.21203/rs.3.rs-9097791/v1)
Supplement: Supplementary file 1 [file 31172d9373725d527d21845f.doc]

#
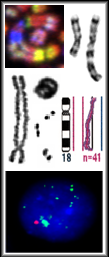
Cytogenetics Core Facility, Johns Hopkins Cancer Center

**Halsted 281 / Nelson 208**

**phone 410-955-1258, fax 410-614-7440**

### Dr Ying Zou, Director

**Melanie Klausner**

**Laura Morsberger**

Specimen(s): r25-015, 10 cell lines

Received date: 5/16/2025

Received from: Ava Wang

Report date: 6/4/2025 MEK,

Reviewed date: 6/13/2025 YZ

100 interphase nuclei were scored following fluorescence in situ hybridization (FISH) with a MYC/IGH/cep8 tri-color probe.

Results:

| **Cell Line** | **8 centromere**  **Copy Number** | **MYC (8q24)**  **Copy**  **Number** | **IGH (14q32)**  **Copy Number** | **Chromosome 8 gain in 10% - 50% of cells?** | **Chromosome 8 gain in >=50%**  **of cells?** | **MYC 8q gain in**  **10%-50% of cells?** | **MYC 8q gain in**  **>=50% of cells?** |
| --- | --- | --- | --- | --- | --- | --- | --- |
| **ST8814** | 2 | 4.24 | 2 | No | No | No | Yes (in 100%) |
| **NF90.8** | 3.24 | 3.97 | 4.28 | No | Yes (in 84%) | No | Yes (in 98%) |
| **S462** | 4.5 | 9.68 | 4.35 | No | Yes (in 100%) | No | Yes (in 100%) |
| **NF10.1** | 2 | 4 | 2 | No | No | No | Yes (in 100%) |
| **NF11.1** | 3 or 6* | 4.25 | 6.23 | No | Yes (in 100%) | No | Yes (in 100%) |
| **JH-2-002** | 6.75 | 6.8 | 6.95 | No | Yes (in 100%) | No | Yes (in 100%) |
| **JH-2-0-55d** | 2.16 | 2.16 | 2.16 | Yes (in 11%) | No | Yes (11%) | No |
| **JH-2-079c(3)** | 4 | 8.4 | 4 | No | Yes (in 100%) | No | Yes (in 100%) |
| **JH-2-103** | 3.5 | 3.72 | 2.91 | No | Yes (in 100%) | No | Yes (in 100%) |
| **JH-2-155b** | 3 | 5.82 | 2 | No | Yes (in 100%) | No | Yes (in 100%) |

* Note for NF11.1: The cep8 probe was displaying some non-specific binding on this sample; there are either 3 or 6 copies of centromere 8. Regardless, 100% of cells had greater than or equal to 3 copies.

We define MYC 8q gain as three or more copies of the MYC gene, whereas amplification is typically characterized by more than four copies.
