# Supplementary material
Source: Research Square preprint supplement (doi:10.21203/rs.3.rs-9097791/v1)
Supplement: Supplementary file 2 [file 8ad71e0f7708391779b0520e.xlsx]

## Sheet: README
Sheet

## Sheet: KSEA
Rank_metric
