# Supplementary material
Source: Research Square preprint supplement (doi:10.21203/rs.3.rs-9097791/v1)
Supplement: Supplementary file 3 [file 90b88e6a2b8a99aa20d89f03.xlsx]

## Sheet: README
Sheet

## Sheet: phospho
WU-487_rep1
