# Supplementary material
Source: Research Square preprint supplement (doi:10.21203/rs.3.rs-9097791/v1)
Supplement: Supplementary file 5 [file c52059876e990d387048eb81.xlsx]

## Sheet: README
Sheet

## Sheet: Copy_number
Gene

## Sheet: RNA
Gene

## Sheet: Protein
Gene

## Sheet: Phospho
SUB_SITE
