# Supplementary material
Source: Research Square preprint supplement (doi:10.21203/rs.3.rs-9097791/v1)
Supplement: Supplementary file 6 [file cc6f1c7656eda84c1e4b30ef.xlsx]

## Sheet: README
Sheet

## Sheet: DrugCorrelations
Omics

## Sheet: DMEA
Omics
