# Supplementary material
Source: Research Square preprint supplement (doi:10.21203/rs.3.rs-9097791/v1)
Supplement: Supplementary file 7 [file e1021b0995844fd841584aea.xlsx]

## Sheet: README
Sheet

## Sheet: global
WU-487_rep1
